# Supplementary material
Source: PubMed Central journal article supplement (PMC3083229)
Supplement: supp_M110.206664_jbc.M110.206664-2.pdf [file supp_M110.206664_jbc.M110.206664-2.pdf]

**Supplemental Table 1:**

Primer Sequences (Forward/ Reverse) used for RT-PCR of major mouse HS biosynthetic enzymes\*.

| HS Biosynthetic Enzyme: | Forward Primer        | Reverse Primer           |
|-------------------------|-----------------------|--------------------------|
| XylT1                   | AATTCCTTGTGCACCTTG    | GACTGGGCAGGATTGATG       |
| XylT2                   | ACGTTCAACCGCAAACCTACC | ATTGCTCAGTTCCCCATCTG     |
| GalT1                   | CATTCTGCTGCTGTCCAAAC  | ATCCACCCGGTACTTCACAG     |
| GalT2                   | GCAAATCTCTGGGTTCAAGG  | GTTGGCCACTTAGGCTGTTG     |
| GlcAT1                  | TGTCATTACCCCCACCTACG  | TGTGTAAAGAGGAGACCAGAGG   |
| Ext1                    | TTCTGGTGTCTGCTGTGAC   | CAAACCAGCTGGCAAATGTA     |
| Ext2                    | ATTTTCTGGTGGCCAATGTC  | TGTTGGGGAAGCTCTTCAGT     |
| Ndst1                   | GGACATCTGGTCTAAG      | GATGCCTTTGTGATAG         |
| Ndst2                   | TGGTCCAAGGAGAAAACCTG  | GGTACGACCTCCGAGTCAAA     |
| Ndst3                   | CCACTGCCTTGTGTC       | GGAGTACGCTCGGTC          |
| Ndst4                   | CTAACTACTTCCACTC      | ATGTGCACTGCATAACC        |
| C5-Epi                  | AAACAGCAGAAGACAGGGACA | GCTGCAAAGACACACCTTCA     |
| Hs2st                   | GGAGCTCGAGGACTTCATCA  | GGAAGTCTCCAGAGCAAAC      |
| Hs6st1                  | ACTGGACCGAACTCACCAAC  | TCACACATGTGCAAGGAGGT     |
| Hs6st2                  | GGCTCTTCTCCAGGTTCTCC  | GGATGCTTTCCAAGTTGCTC     |
| Hs6st3                  | GCCATCATGGAGAAGAAGGA  | CATCCCCAGGATAGCAGGTA     |
| Hs3st1                  | TGGAATAGACACCTCCCCTT  | CGCCTGGATCATGAAGTAGC     |
| Hs3st2                  | GGACGAGGACTGGACTGGTA  | GCACCACCACTATCAGCTTG     |
| Hs3st3a                 | CTGGCCTTACTTCTGGACGA  | CAAAGTAGCTGGGCGTCTTC     |
| Hs3st3b                 | TCATCATCGGGGTGAAGAAG  | ACGATGAGCTTGGTGTCCCTT    |
| Hs3st4                  | TCAAGAAAGGAGGGACACGC  | TCTGGGTATAGTCAGAAATGGCCC |
| Hs3st5                  | TTCAAACAGCAGGTGTGGCT  | TTCCGGAACCTCATGCAGCAA    |
| Hs3st6                  | CTCTGAACCCCACTTCTTCG  | AGGCGCTTAGCAACAGAACT     |
| Sulf1                   | AAACAGTGCAACCCAAGACC  | CTTGCACCGGATAACTCCTC     |
| Sulf2                   | GACAGGGACGTCCTTAACCA  | CCCATAGCTGTCCCAGTGAT     |

\* Legend for enzymes: XylT1,2 (Xylosyltransferase-1, -2); GalT1,2 (Galactosyltransferase-1, -2); GlcAT1 (Glucuronosyltransferase-1); Ext1,2 (Exostosin-1); Ndst1-4 (N-deacetylase/ N-sulfotransferase 1-4); C5-Epi (C5-Epimerase); Hs2st (HS 2-O-sulfotransferase); Hs6st1-3 (HS 6-O-sulfotransferases 1-3); Hs3st1-6 (HS 3-O-sulfotransferases 1-6); Sulf1,2 (HS endosulfatase-1, -2).
